# Supplementary material
Source: Research Square preprint supplement (doi:10.21203/rs.3.rs-8865885/v1)
Supplement: Supplementary file 1 [file 9a0837c22655fa817644a66a.docx]

Interview Questions

1. Tell me about your working relationships with labor and delivery nurses in the hospital
   - Prompts – what are some barriers to a good relationship, what things help to grow a good relationship
2. Tell me about how your working relationships with labor and delivery nurses impacts the care you provide.
3. Tell me about the differences in the way labor and delivery nurses interact with you versus other members of the healthcare team.
   - Prompt - Do you see a difference when they interact with physicians
