# Supplementary material
Source: Research Square preprint supplement (doi:10.21203/rs.3.rs-8865885/v1)
Supplement: Supplementary file 2 [file ed09c1323e0e9fa5d7ceb97b.docx]

Participant Demographic and Work Survey

1. Age: __________
2. Gender (circle one)

Male Female Other

1. Ethnicity:
   1. African-American
   2. Asian/Pacific Islander
   3. White (non-Hispanic)
   4. Latino or Hispanic
   5. American Indian/Alaskan Native
   6. Other: ___________________
2. Have you or your significant other given birth:

Yes No

1. I, or my significant other have given birth:
   1. Vaginally
   2. By Cesarean
   3. With Vacuum extraction
   4. With Forceps
   5. Not applicable
2. I, or my significant other have given birth:
   1. At home
   2. At a hospital
   3. In a freestanding birth center
   4. Not applicable
   5. Other: ________________________
3. Years as practicing Registered Nurse: ________
4. Years practicing in Perinatal Nursing (not including care as a Midwife): ________
5. Years as a Certified Nurse Midwife: _________
6. Indicate all nursing education levels you have completed (select all that apply):
   1. Diploma of Nursing
   2. Associate Degree of Nursing
   3. Bachelor of Science in Nursing
   4. Masters in Nursing
   5. Masters of Science in Nursing
   6. Masters in Nurse Midwifery
   7. Nurse Doctorate
   8. Certificate of Nurse Midwife
   9. Doctorate of Nursing Practice
   10. Doctor of Philosophy in Nursing
   11. Other: ____________________
7. What state did you receive your midwifery education in: _______________
8. What state(s) have you practiced in: __________________________________
9. National Certification Completion (select all that apply)
   1. Inpatient Obstetric Nursing (RNC-OB)
   2. Maternal Newborn Nursing (RNC-MNN)
   3. Low Risk Neonatal Nursing (RNC – LRN)
   4. Neonatal Intensive Care Nursing (RNC-NIC)
   5. Ambulatory Women’s Health Care Nurse
   6. High Risk Obstetric Nurse
   7. Reproductive Endocrinology/Infertility Nurse
   8. Electronic Fetal Monitoring (C-EFM)
   9. Certified Lactation Educator (CLC)
   10. International Board Certified Lactation Consultant (IBCLC)
   11. Certified Lactation Specialist
   12. Certified Lactation Educator Counselor
   13. Breastfeeding Educator
   14. Other: _______________________________________
10. Have you participated in delivery of home births?

Yes No

1. Have you participated in delivery at a birthing center?

Yes No

1. Do you currently work in a hospital setting?

Yes No

1. What is the acuity level of your hospital work setting (if applicable):
   1. Level 1
   2. Level II
   3. Level III
   4. Level IV
2. Average monthly births (if applicable): __________
3. Do you have a collaborative agreement with a physician/physician group?

Yes No
